# Supplementary material for: Alterations of Mitochondrial Structure in Methamphetamine Toxicity
Source: MDPI journal article supplement (doi:10.3390/ijms23168926), 2022-08-10
Supplement: s1 [file s1]

A

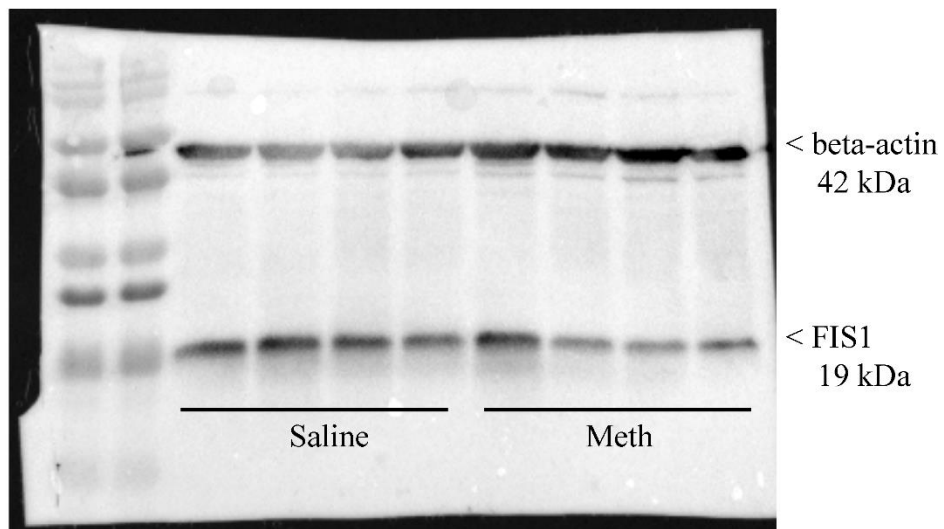

B

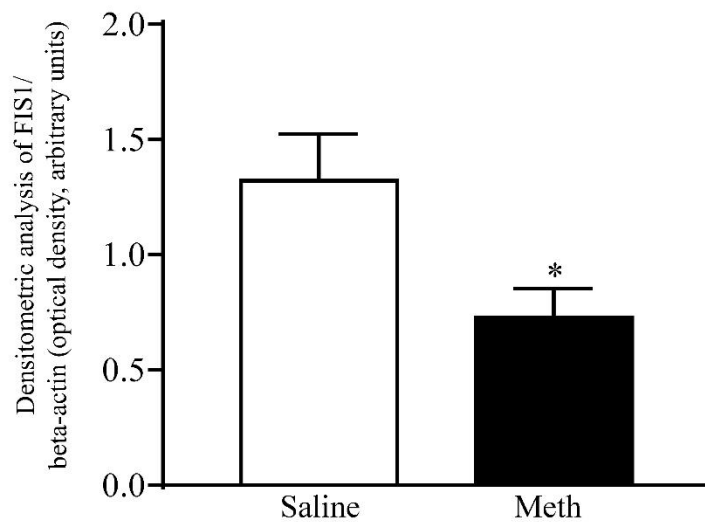

**Supplementary Figure S1.** METH (100  $\mu$ M) decreases the fission protein Fis1. **(A)** Representative blots of Fis1 protein. **(B)** Graph reports METH-induced decrease of Fis1 levels. Values are given as the mean  $\pm$  S.E.M. from 4 samples per group. \* $p \leq 0.05$  compared with controls.

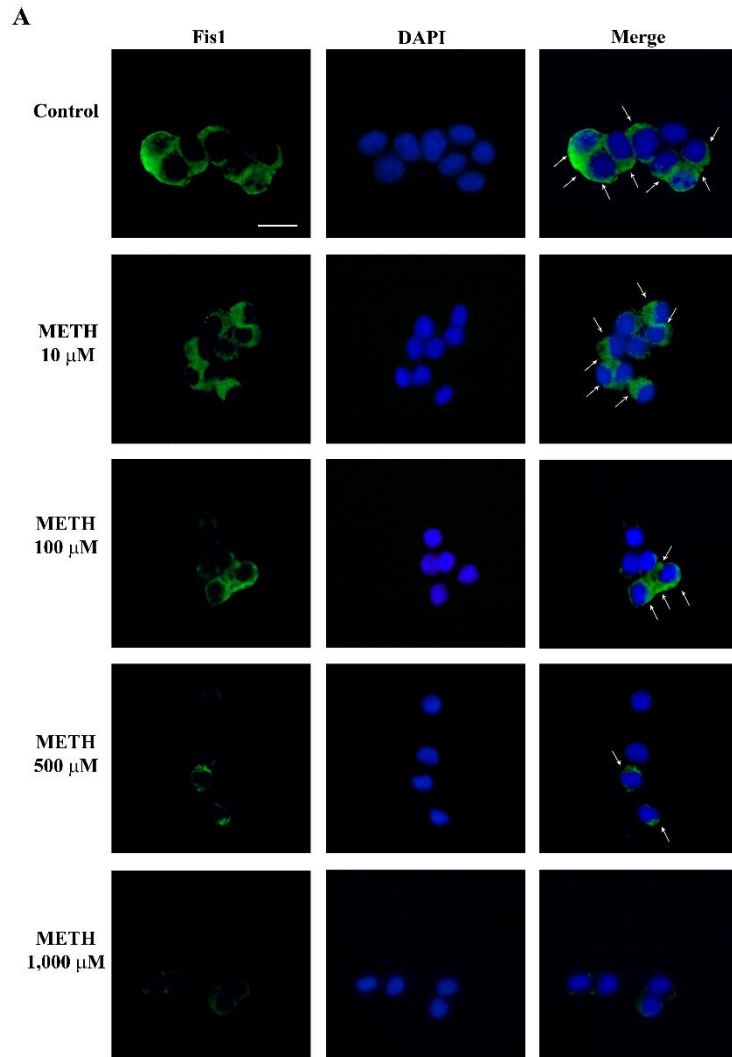

**B**

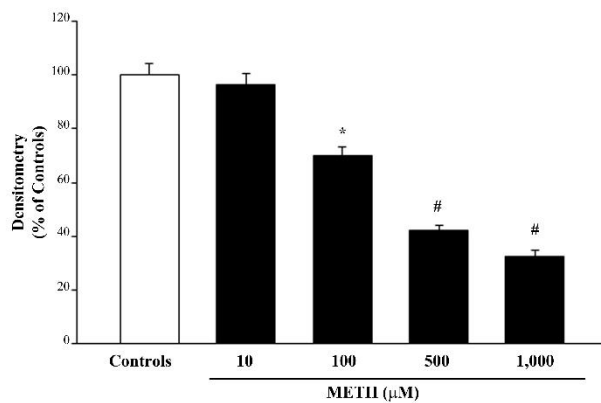

**Supplementary Figures S2.** METH decreases immunofluorescence for Fis1. **(A)** Representative pictures of the fission marker Fis1 in control and following METH treatment (from 10  $\mu$ M up to 1,000  $\mu$ M). Arrows point to intense fluorescent areas. **(B)** The graph reports densitometry of Fis1 immunofluorescence. Values are given as the mean $\pm$ S.E.M from N=100 cells per group. \* $p\leq 0.05$  compared with controls and METH 10  $\mu$ M; # $p\leq 0.05$  compared with controls and METH up to 100  $\mu$ M. Scale bar=13  $\mu$ m.

A

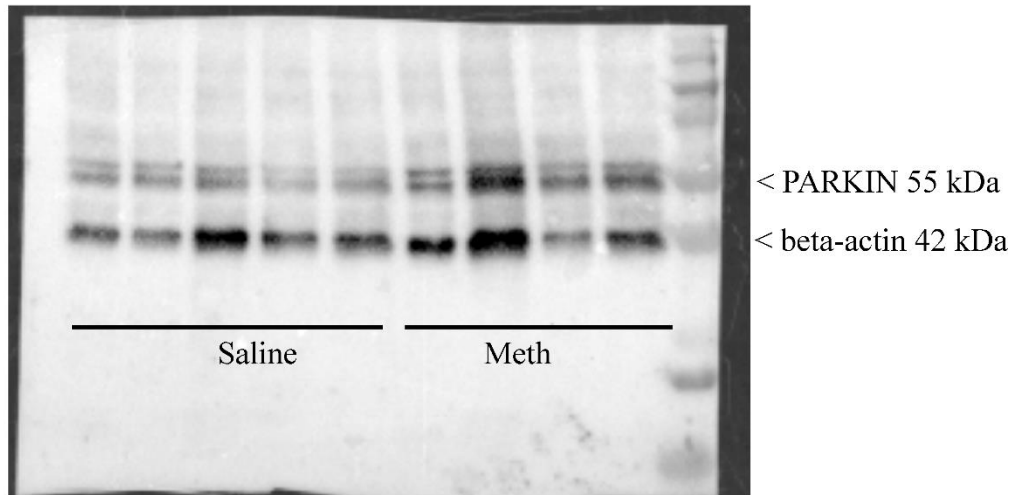

B

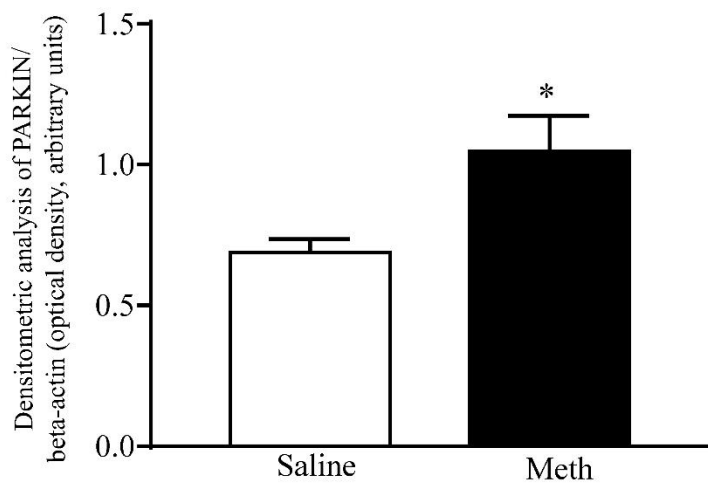

**Supplementary Figure S3.** METH (100  $\mu$ M) increases the protein Parkin. (A) Representative blots of Parkin. (B) Graph reports the METH-induced increase of the levels of Parkin. Values are given as the mean $\pm$ S.E.M. from at least 4 samples per group. \* $p\leq 0.05$  compared with controls.

A

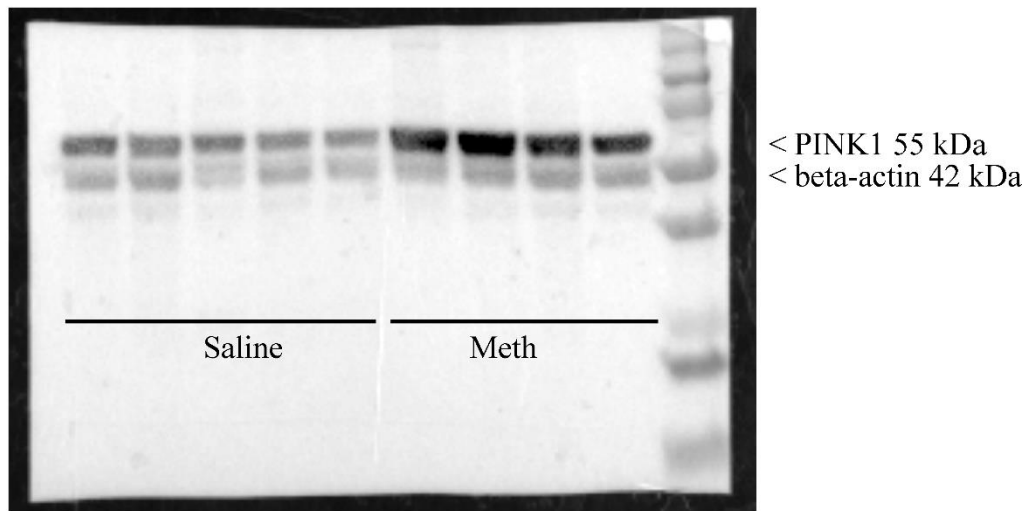

B

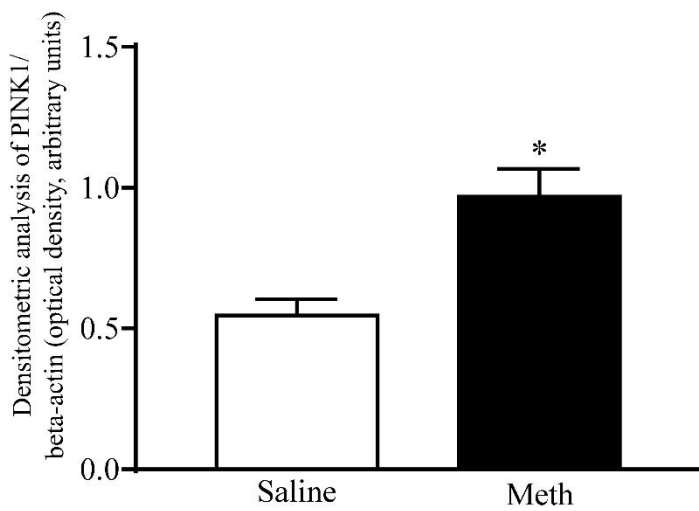

**Supplementary Figure S4.** METH (100  $\mu$ M) increases the protein Pink1. (A) Representative blots of Pink1. (B) Graph reports METH-induced increase of Pink1. Values are given as the mean  $\pm$  S.E.M. from at least 4 samples per group. \* $p \leq 0.05$  compared with controls.

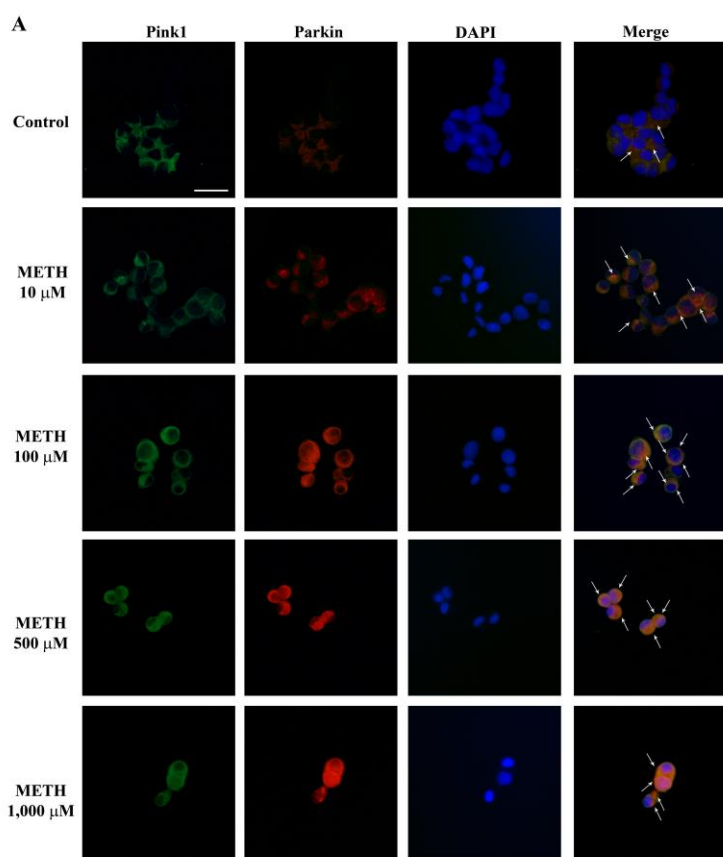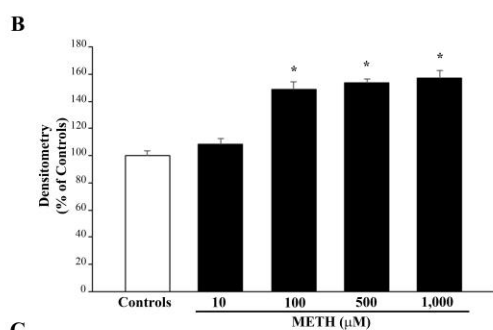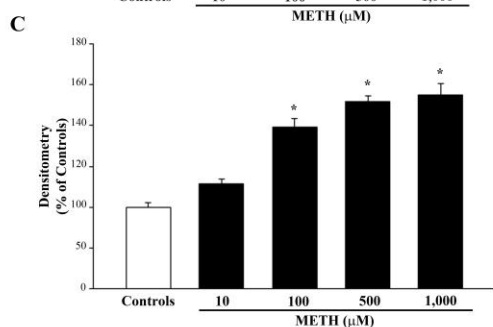

**Supplementary Figure S5.** METH increases both Pink1 and Parkin immunofluorescence. **(A)** Representative pictures show Pink1 and Parkin immunofluorescence from control and METH-treated cells (from 10  $\mu$ M up to 1,000  $\mu$ M). Arrows point to merging (yellow) areas. The graphs report the densitometry of Pink1 immunofluorescence **(B)**, and Parkin immunofluorescence **(C)**. Data are given as the mean $\pm$ S.E.M. from N=90 cells per group. \* $p\leq 0.05$  compared with controls. Scale bar=17 $\mu$ m.

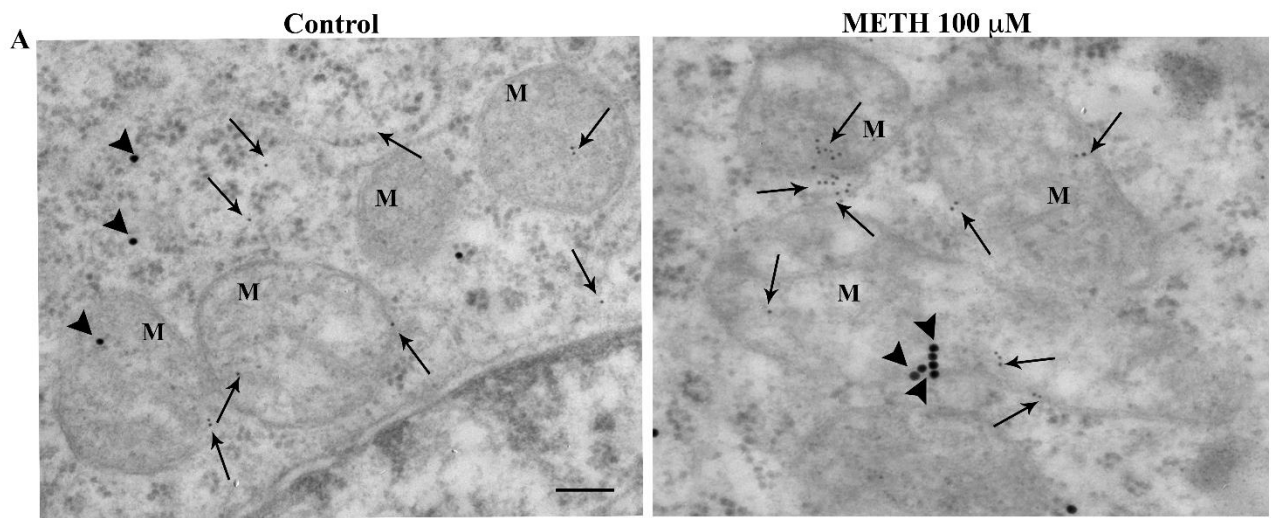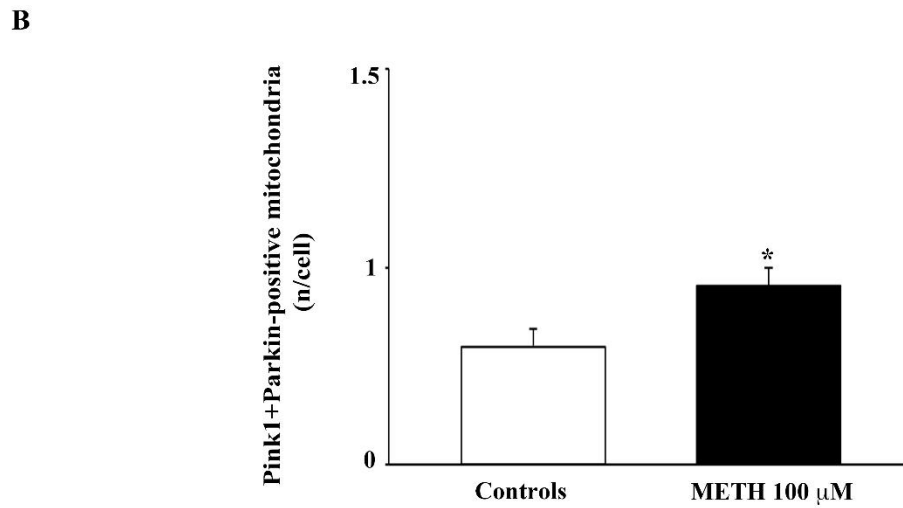

**Supplementary Figure S6.** METH increases the mitochondrial co-localization of Pink1 and Parkin. **(A)** Representative TEM micrographs showing Pink1- and Parkin- immunogold particles in control and METH 100  $\mu$ M-treated cells. Arrows point to Parkin immunogold particles (10 nm), while arrowheads point to Pink1 immunogold particles (20 nm) within mitochondria. M=mitochondria. **(B)** Graph report the number of Pink1+Parkin-positive mitochondria. Values are given as the mean $\pm$ S.E.M. counted in 50 cells per group. \* $p \leq 0.05$  compared with controls. Scale bar=170  $\mu$ m.

**A**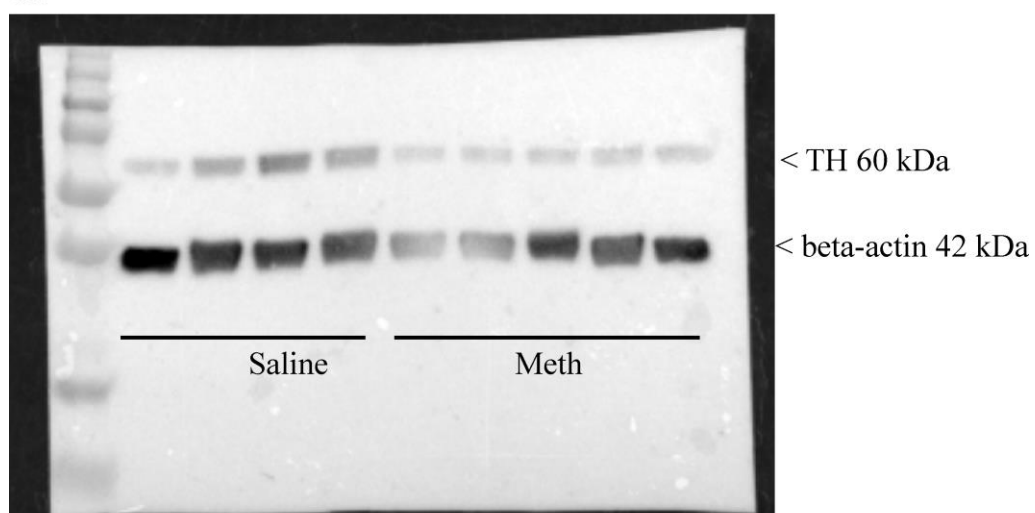**B**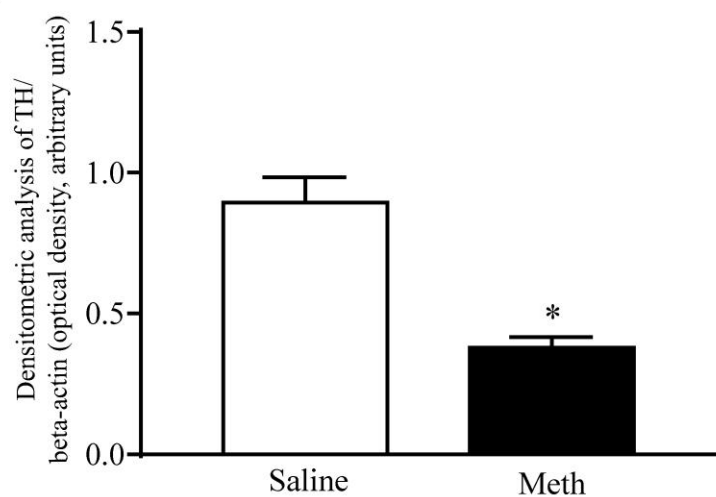

**Supplementary Figure S7.** METH (100  $\mu$ M) decreases tyrosine-hydroxylase (TH). **(A)** Representative blots of TH. **(B)** Graph reports METH-induced decrease of the levels of TH. Values are given as the mean $\pm$ S.E.M. from at least 4 samples per group. \* $p \leq 0.05$  compared with controls.
